# Supplementary material for: High-Resolution Genetic Mapping in the Diversity Outbred Mouse Population Identifies Apobec1 as a Candidate Gene for Atherosclerosis
Source: PubMed Central journal article supplement (PMC4267931; doi:10.1534/g3.114.014704), 2014-10-23
Supplement: supp_g3.114.014704_FigureS2.pdf [file supp_g3.114.014704_FigureS2.pdf]

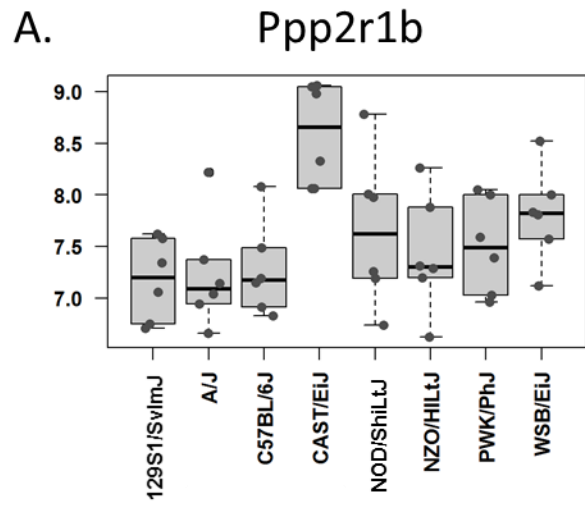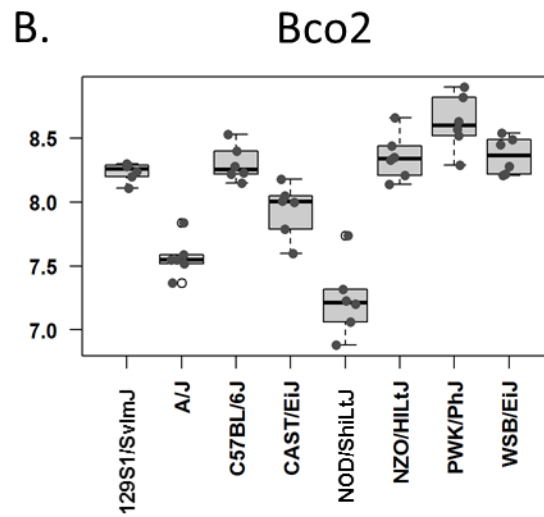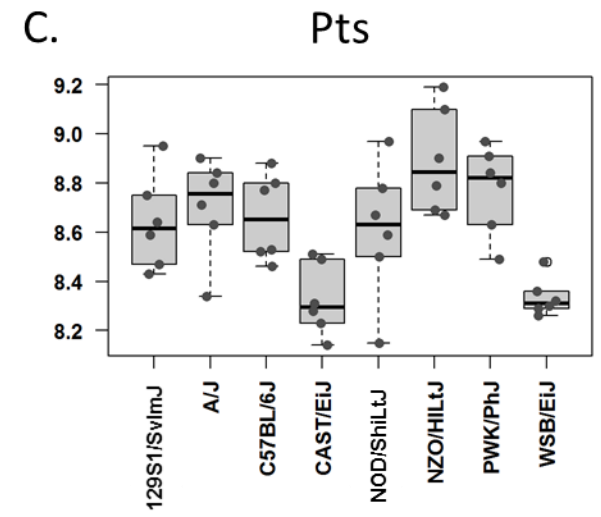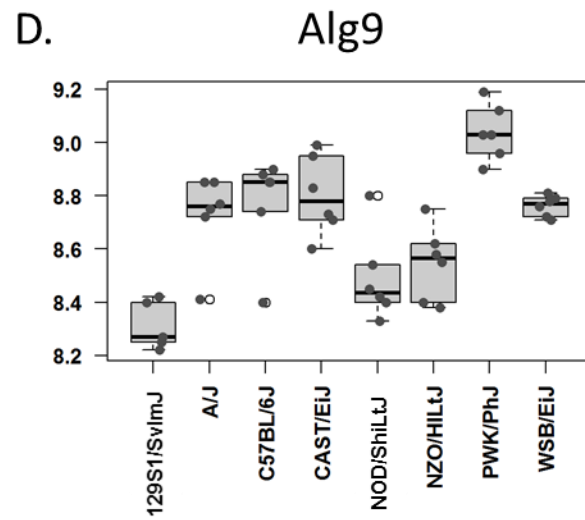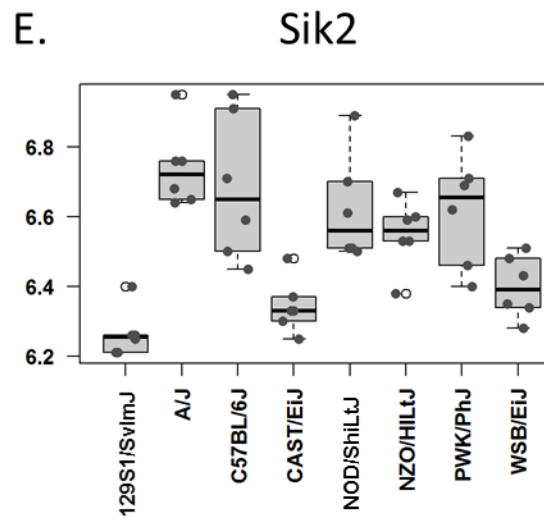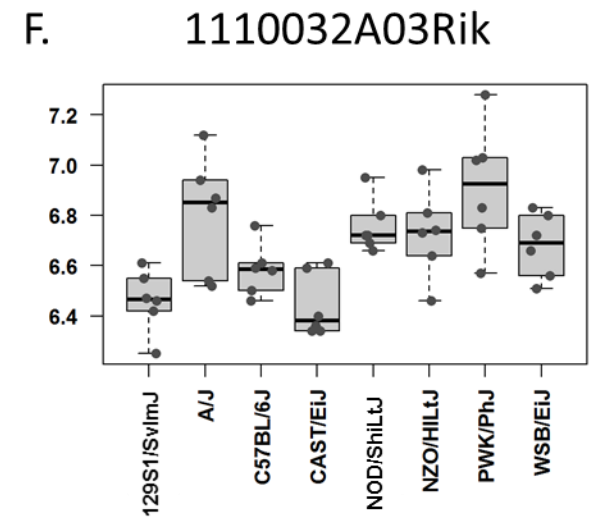

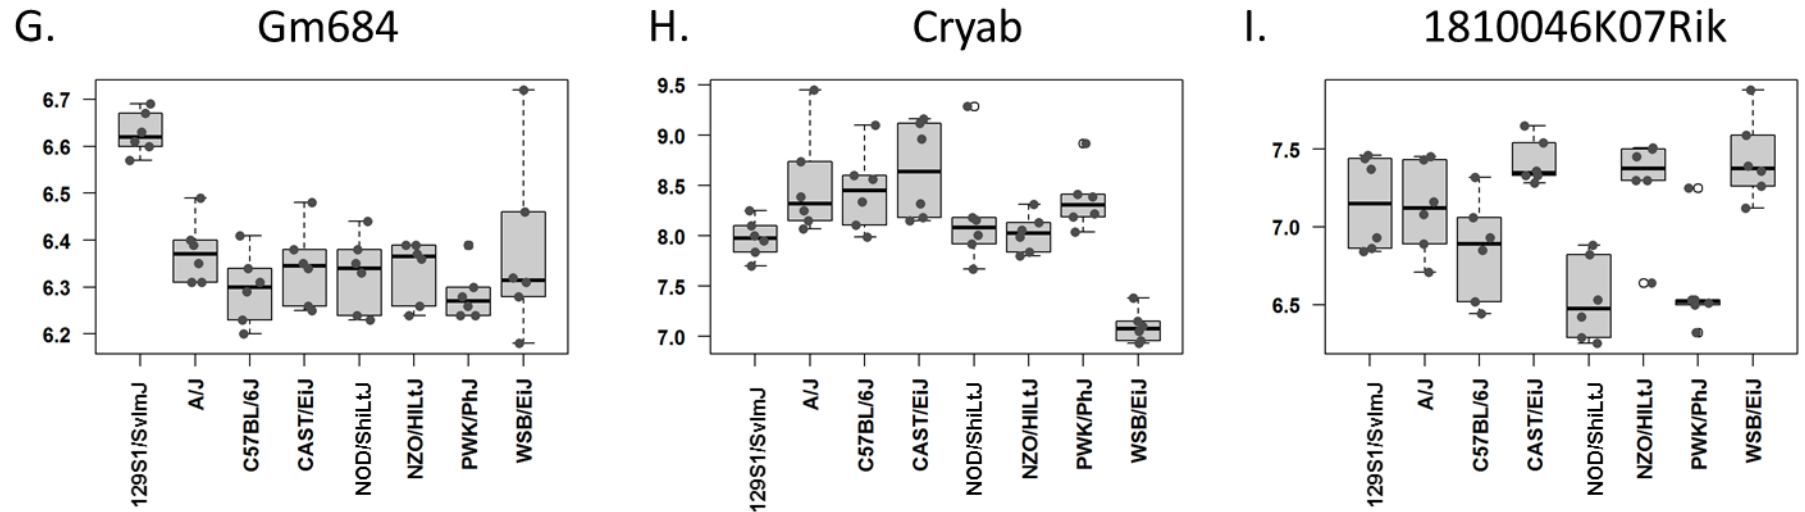

**Figure S2 Liver expression of candidate genes in the Chromosome 9 peak region associated with baseline triglyceride levels.** Gene expression data was obtained from livers of female C57BL/6J, A/J, NOD/ShiLtJ, NZO/HiLtJ, WSB/EiJ, CAST/EiJ, PWK/PhJ and 129S1/SvImJ mice (<http://cgd.jax.org/gem/strainsurvey26>). Hepatic gene expression of 68 probes representing the 34 genes at the locus were compared. Differential expression of genes across the founder strains was determined using a 1-way ANOVA analysis and a Bonferroni correction for multiple tests. We identified 9 genes as differentially expressed among the founder strains: *Ppp2r1b*, *Bco2*, *Pts*, *Alg9*, *Sik2*, *1110032A03Rik*, *Gm684*, *Cryab*, and *1810046K07Rik* (A.–I.). *Bco2* and *Ppp2r1b* are differentially expressed between CAST/EiJ and the other progenitor strains and, therefore, most closely match the allele effects of the QTL.
